# Supplementary material for: Risk of Sudden Death in a General Unbiased Epidemiological Cohort of Sarcoidosis
Source: PubMed Central journal article supplement — J Am Heart Assoc. 2022 Aug 5;11(16):e025479. doi: 10.1161/JAHA.122.025479 (PMC9496302; doi:10.1161/jaha.122.025479), 2022-08-05
Supplement: JAH3-11-e025479-s001.pdf [file JAH3-11-e025479-s001.pdf]

# **Supplemental Material**

**Table S1. Cox proportional hazards ratios for univariate variables of age, male sex and absence of intrathoracic disease.**

| <b>Variable</b>                  | <b>Hazards Ratio</b> | <b>95% Confidence Interval</b> |
|----------------------------------|----------------------|--------------------------------|
| Age (per 10-year increase)       | 2.48                 | 1.97-3.13                      |
| Male sex                         | 1.98                 | 1.04-3.79                      |
| Absence of intrathoracic disease | 3.57                 | 1.08-12.5                      |
| *Hepatic involvement             | 5.37                 | 1.90-15.2                      |
| *Cardiac involvement             | 12.4                 | 2.76-55.2                      |
| *Splenic                         | 11.5                 | 4.05-32.9                      |
| *Neurologic                      | 4.18                 | 1.44-12.1                      |

Hazard ratios for other organs involved (in addition to intrathoracic involvement).

\*adjusted for age, sex and calendar year of diagnosis.
